# Supplementary material for: Occurrence and Health Risks of Heavy Metals in Drinking Water of Self-Supplied Wells in Northern China
Source: MDPI journal article supplement (doi:10.3390/ijerph191912517), 2022-09-30
Supplement: s1 [file s1]

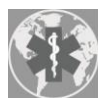

Supplementary Materials

# Occurrence and health risks of heavy metals in drinking water of self-supplied wells in northern China

Miao Bai <sup>1,2,†</sup>, Can Zhang <sup>1,\*</sup>, Yuchao Bai <sup>1†</sup>, Tianyi Wang <sup>1</sup>, Shaojuan Qu <sup>1</sup>, Hongjuan Qi <sup>1</sup>, Minglu Zhang <sup>2</sup>, Chaohong Tan <sup>3</sup> and Chuanfu Zhang <sup>1,\*</sup>

<sup>1</sup> Center for Disease Control and Prevention of Chinese PLA, Beijing 100071, China

<sup>2</sup> Department of Environmental Science and Engineering, Beijing Technology and Business University, Beijing 100048, China

<sup>3</sup> School of Environment and Energy Engineering, Beijing University of Civil Engineering and Architecture, Beijing 102616, China

\* Correspondence: zhangcancqu@163.com (Can Zhang); hnzcf@126.com (Chuanfu Zhang)

† These authors contributed to this work equally.

**Table S1.** Exposure parameters used for health risk assessment.

| Exposure parameters | Description              | Adult | Child | Unit |
|---------------------|--------------------------|-------|-------|------|
| IR                  | ingestion rate of water  | 2.5   | 0.78  | L/d  |
| EF                  | exposure frequency       | 350   | 350   | d/a  |
| ED                  | exposure duration        | 26    | 6     | a    |
| BW                  | average body weight      | 80    | 15    | kg   |
| AT                  | average time of exposure | 8760  | 2190  | d    |

**Table S2.**  $SF_i$  and  $RfD_i$  and for the different heavy metals.

| Elements | $RfD_i$ | Elements | $RfD_i$ | Elements | $SF_i$ |
|----------|---------|----------|---------|----------|--------|
| Ag       | 0.005   | Li       | 0.02    | As       | 1.5    |
| Al       | 1       | Mn       | 0.02    | Cd       | 6.1    |
| As       | 0.0003  | Ni       | 0.02    | Cr       | 0.5    |
| B        | 0.09    | Pb       | 0.0014  |          |        |
| Ba       | 0.07    | Sb       | 0.0004  |          |        |
| Cd       | 0.0005  | Se       | 0.005   |          |        |
| Cu       | 0.04    | Tl       | 0.00001 |          |        |
| Cr       | 0.003   | V        | 0.001   |          |        |
| Fe       | 0.3     | Zn       | 0.3     |          |        |
